# Supplementary figures and images for: Development of a gradient micellar liquid chromatographic method eluting from micellar mode to high submicellar mode for the rapid separation of free amino acids
Source: Royal Society of Chemistry journal article supplement (doi:10.1039/c6ay03453e), 2017-01-01

### Supplementary Captions of Figures

Fig.S1 The equation for reaction of Fmoc-Cl and amino acids

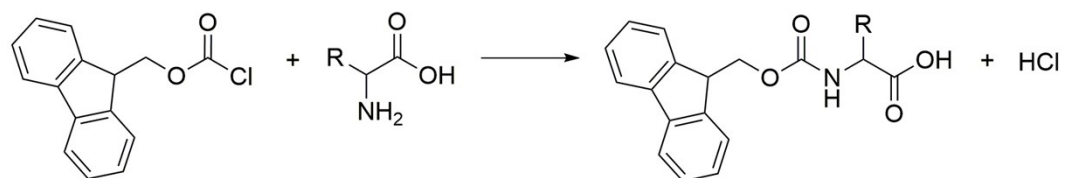

Supplement: c6ay03453e1.pdf [file c6ay03453e1.pdf]
